# Supplementary material for: Antioxidant and Anti-Breast Cancer Properties of Hyaluronidase from Marine Staphylococcus aureus (CASMTK1)
Source: MDPI journal article supplement (doi:10.3390/jmse11040778), 2023-04-03
Supplement: s1 [file s1]

**Supplementary Table S1. Optimization of hyaluronidase enzyme production from marine *S. aureus* CASMTK1.**

| <b>Effect of pH</b>                         | <b>Enzyme Activity</b> |
|---------------------------------------------|------------------------|
| 4                                           | 93                     |
| 5                                           | 102.5                  |
| 6                                           | 80                     |
| 7                                           | 72.5                   |
| 8                                           | 65                     |
| <b>Effect of Salinity</b>                   | <b>Enzyme Activity</b> |
| 25                                          | 62.8                   |
| 30                                          | 78.4                   |
| 35                                          | 91.3                   |
| 40                                          | 86.1                   |
| 45                                          | 54.6                   |
| <b>Effect of Incubation Period</b>          | <b>Enzyme Activity</b> |
| 24                                          | 63.2                   |
| 48                                          | 69.3                   |
| 72                                          | 84.6                   |
| 96                                          | 98.1                   |
| 120                                         | 83.9                   |
| <b>Effect of Temperature</b>                | <b>Enzyme Activity</b> |
| 25                                          | 63.2                   |
| 30                                          | 71.6                   |
| 35                                          | 86.8                   |
| 40                                          | 95.5                   |
| 45                                          | 81.3                   |
| <b>Effect of Carbon Sources</b>             | <b>Enzyme Activity</b> |
| Maltose                                     | 77.5                   |
| Fructose                                    | 82.5                   |
| Lactose                                     | 60                     |
| Starch                                      | 92.5                   |
| Cellulose                                   | 52.5                   |
| <b>Effect of Inorganic Nitrogen Sources</b> | <b>Enzyme Activity</b> |
| A. acetate                                  | 35                     |
| A. nitrate                                  | 62.5                   |
| A. Suphate                                  | 95                     |
| S. nitrate                                  | 57.5                   |
| Urea                                        | 86.7                   |

**Supplementary Table S2. FTIR band assignments of hyaluronidase in the region of 500–4000 cm<sup>-1</sup>.**

| S. No. | Wavenumber<br>(cm <sup>-1</sup> ) | Band Assignments         |
|--------|-----------------------------------|--------------------------|
| 1      | 888                               | C-H Plane bending        |
| 2      | 932                               | O-H bend                 |
| 3      | 1041                              | CO-O-CO Stretching       |
| 4      | 1075                              | C-O Stretching           |
| 5      | 1118                              | C-O Stretching           |
| 6      | 1238                              | C-N Stretching           |
| 7      | 1307                              | C-O Stretching           |
| 8      | 1402                              | S=O Stretching           |
| 9      | 1447                              | C-H bending              |
| 10     | 1545                              | N-O Bending              |
| 11     | 1659                              | N-H Bending              |
| 12     | 2101                              | N=C=S Stretching         |
| 13     | 2849                              | C-H Stretching           |
| 14     | 2871                              | C-H Stretching           |
| 15     | 2926                              | C-H Stretching           |
| 16     | 2959                              | C-H Stretching           |
| 17     | 3435                              | O-H Stretching, H-bonded |

**Supplementary Table S3. FT-Raman band assignments of hyaluronidase in the region of 500–3000 cm<sup>-1</sup>.**

| <b>S. No.</b> | <b>Wavenumber<br/>(cm<sup>-1</sup>)</b> | <b>Band Assignments</b>          |
|---------------|-----------------------------------------|----------------------------------|
| 1             | 452                                     | C-N-C Bend                       |
| 2             | 616                                     | C=O Plane bend                   |
| 3             | 760                                     | C-Cl Stretch                     |
| 4             | 909                                     | CH <sub>2</sub> Plane            |
| 5             | 985                                     | CH <sub>2</sub> Plane            |
| 6             | 1057                                    | S=O Stretch                      |
| 7             | 1184                                    | C-O Stretch                      |
| 8             | 1293                                    | C-F Stretch                      |
| 9             | 1399                                    | COO <sup>-</sup> Carboxylic acid |
| 10            | 1466                                    | CH <sub>2</sub> Vibrations       |
| 11            | 1707                                    | C=O Stretch                      |
| 12            | 1996                                    | Benzene Ring                     |
| 13            | 2091                                    | C≡ Stretch                       |
| 14            | 2763                                    | NH Stretching                    |
| 15            | 2815                                    | CH Stretching                    |
| 16            | 2950                                    | CH Stretching                    |
| 17            | 3050                                    | H bonded, OH Stretch             |
